# 1 Bayesian inference of circular variables 2 in ring attractor networks

3  
4 Anna Kutschireiter<sup>1\*</sup>, Melanie A Basnak<sup>1</sup>, Jan Drugowitsch<sup>1</sup>

5 <sup>1</sup>Harvard Medical School, Department of Neurobiology, 200 Longwood Avenue, Boston, MA-  
6 02115, United States.

7 \*Correspondence: [anna\\_kutschireiter@hms.harvard.edu](mailto:anna_kutschireiter@hms.harvard.edu), [jan\\_drugowitsch@hms.harvard.edu](mailto:jan_drugowitsch@hms.harvard.edu)

## 8 Summary

9 Working memories are thought to be held in attractor networks in the brain. Because working  
10 memories are often based on uncertain information, memories should ideally come with a  
11 representation of this uncertainty for strategic use in behavior. However, the attractor states that  
12 hold these memories in attractor networks commonly do not represent such uncertainty. Focusing  
13 here on ring attractor networks for encoding head direction, we show that these networks in fact  
14 feature all the motifs required to represent uncertainty in head direction estimates. Specifically,  
15 they could do so by transiently modulating their overall activity by uncertainty, in line with a circular  
16 Kalman filter that performs near-optimal statistical circular estimation. More generally, we show  
17 that ring attractors can perform near-optimal Bayesian computation if they can flexibly deviate  
18 from their attractor states. Finally, we show that the basic network motifs sufficient for such  
19 statistical inference are already known to be present in the brain. Overall, our work demonstrates  
20 that ring attractors can in principle implement a dynamic Bayesian inference algorithm in a  
21 biologically plausible manner.

## 22 Keywords

23 Working memory; Bayesian inference; Ring attractor networks; Head direction neurons; Kalman  
24 filtering; Population coding; Drosophila; Central complex;

## 25 Introduction

26 Many brain functions - including motor control, classification, and pattern completion - have been  
27 attributed to attractor networks, and they have proven particularly useful in modeling working  
28 memory<sup>1,2</sup>. More specifically, these networks support neural population activity patterns that  
29 persist even in the absence of inputs, endowing them with the ability to retain past information  
30 across time<sup>3</sup>. A change in the memory's content then corresponds to a change in the network's  
31 population activity pattern. At these *attractor states*, the networks only store "point estimates" of  
32 these memories, without an associated sense of uncertainty. As this stands in conflict with the  
33 observation that memories include a sense of uncertainty (e.g., refs<sup>4,5</sup>), do we need to discard the

34 idea of memories being stored in attractor networks? Our work shows that this does not need to  
35 be the case.

36 A ring attractor is a special case of an attractor whose set of stable activity profiles forms a ring in  
37 neural activity space and thus has the ability to represent circular variables. Head direction (HD)  
38 is a classic example of a circular variable that is encoded by a ring attractor network in the brain<sup>6</sup>.  
39 Many features of mammalian HD neurons are highly suggestive of ring attractors<sup>7-11</sup>. Moreover,  
40 recent work has revealed HD cells in the *Drosophila* brain, which not only function as a ring  
41 attractor, but also form a topographic map of HD<sup>12-14</sup>. Importantly, the brain often estimates HD  
42 under conditions of high uncertainty -- e.g., in unfamiliar environments, or in darkness. Ideally,  
43 these HD networks would respond differently to a new piece of information, depending on the  
44 current level of uncertainty in the HD estimate. Such an uncertainty-weighted response is a  
45 hallmark of Bayesian inference<sup>15</sup>. How exactly the ring attractor networks that track HD could  
46 implement Bayesian inference without an explicit notion of uncertainty, however, remains largely  
47 unknown.

48 To address potential neural mechanisms for doing so, we took a normative modeling approach,  
49 and established how ring attractor networks could maintain and update uncertainty along with the  
50 encoded estimate (see Fig. 1 for an overview of our approach). Specifically, we first asked how  
51 uncertain HD estimates ought to be updated from unreliable information, irrespective of how these  
52 estimates are encoded in the activity of neural populations. We then combined the resulting  
53 Bayesian ideal observer model with a neural representation of uncertain HD estimates to arrive  
54 at a neural network architecture that can well-approximate the required computations.  
55 Interestingly, this network has the general connectivity structure of a ring attractor network.  
56 However, its ability to perform near-Bayesian inference depends on its connectivity strengths. A  
57 tightly connected, “strict” attractor network performs worse than a weakly connected, “loose”  
58 attractor network. This is because strict attractor networks rapidly decay back to their attractor  
59 states, while loose attractor networks can persistently deviate from these states. As we show,  
60 these deviations are essential to perform the required Bayesian computations. Nonetheless, the  
61 networks do not need to be finely tuned to achieve close-to-optimal HD tracking performance.  
62 Indeed, a large range of loose networks can adequately combine uncertain HD estimates with  
63 unreliable sensory information. Lastly, we showed that model ring attractors can implement  
64 dynamic Bayesian inference even after we incorporate constraints from neural connectivity data.  
65 In summary, our work provides a principled theoretical foundation for how attractor networks can  
66 maintain a sense of uncertainty in their memories, even without an explicit notion of uncertainty.  
67 Although we focus on HD encoding as a concrete example, our results are potentially also  
68 relevant to other ring attractors in the brain (e.g., the grid cell representation of an animal’s path).

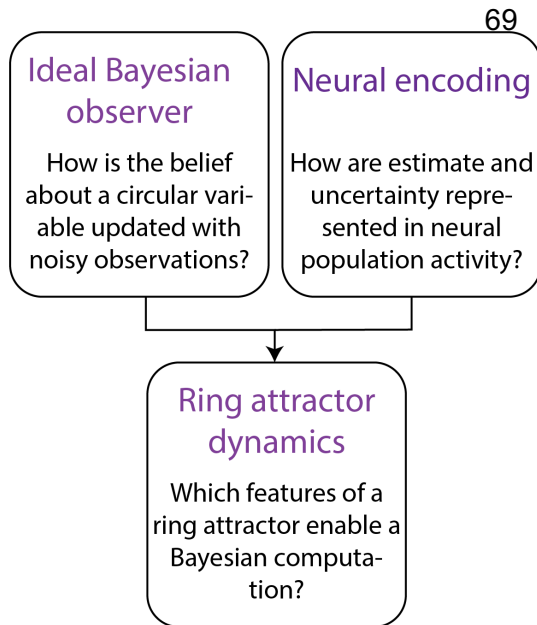

**Figure 1.** Our approach combines an ideal Bayesian observer model for circular variables with a ‘bump’ encoding to derive ring attractor dynamics that perform a Bayesian computation.

83

## 84 Results

### 85 Circular Kalman filtering: a Bayesian ideal observer model for tracking 86 circular variables

87 We first focus on how uncertain memory ought to be updated from new sensory information  
88 irrespective of how this memory is encoded in the activity of a neural network. We do so with the  
89 example of HD tracking, by deriving the statistically best HD estimate from a continuous stream  
90 of unreliable absolute and relative HD information. This results in a generic algorithm - the circular  
91 Kalman filter - that tells us how an estimate of HD, or of any other dynamic circular variable (e.g.,  
92 visual orientation, time of day, etc.), ought to be updated over time, and the role uncertainty plays  
93 in these updates. In the sections that follow we ask how this algorithm can be implemented by  
94 neural networks, and analyze the properties of these networks.

95 HD estimates are informed by two qualitatively different types of sensory inputs (Fig. 2a). Relative  
96 HD observations (or **angular velocity observations**), e.g., vestibular or proprioceptive signals,  
97 provide information about changes in HD. As they tend to be noisy, integrating them over time  
98 results in gradual error accumulation, and a HD estimate that increasingly deviates from the true  
99 HD. **Absolute head direction observations**, such as the position of a visual landmark, provide  
100 direct HD information that can be used to re-calibrate the HD estimate. Since these observations  
101 are also noisy, they should be combined with the internal HD estimate according to their  
102 respective reliabilities.

103 Here, we use dynamic Bayesian inference to properly handle the uncertainties arising from the  
104 aforementioned unreliable sensory inputs. We assume access to both angular velocity

105 observations  $v_t \in R$  and absolute HD observations  $z_t \in [-\pi, \pi]$ , which provide noisy information  
106 about true angular velocity  $\dot{\phi}_t \in R$  and HD  $\phi_t \in [-\pi, \pi]$ , respectively. Specifically, angular velocity  
107 observations are corrupted by Gaussian noise that limits the precision of these observations (with  
108 precision  $\kappa_v$ , larger  $\kappa_v$  = more reliable), while absolute HD observations are corrupted by von  
109 Mises noise with precision  $\kappa_z$ , the Gaussian equivalent for circular variables. Dynamic Bayesian  
110 inference accounts for uncertainties arising from these noisy observations, by forming a **posterior**  
111 **belief** of HD  $p(\phi_t|z_{0:t}, v_{0:t})$  that is continuously updated in light of new incoming sensory  
112 evidence. Importantly, this belief constitutes a whole probability distribution, rather than a single  
113 point estimate, which automatically includes a measure of uncertainty around the best HD  
114 estimate<sup>15,16</sup>.

115 Estimating circular variables, such as HD, precludes the use of standard dynamic Bayesian  
116 inference schemes such as the Kalman filter<sup>17,18</sup> to update the posterior belief  $p(\phi_t|z_{0:t}, v_{0:t})$  over  
117 time. Instead, statistical inference turns out to be analytically intractable<sup>19</sup> and needs to be  
118 approximated (see Methods). Here, we approximate this belief at each point in time by a von  
119 Mises distribution,  $p(\phi_t|z_{0:t}, v_{0:t}) \approx VM(\mu_t, \kappa_t)$ , which is fully characterized by its mean  $\mu_t$ , which  
120 is the current best HD estimate, and its precision  $\kappa_t$ , which measures the estimate's certainty (Fig.  
121 2b). As these two posterior, or belief, parameters fully specify the HD belief, updates of the belief  
122 in light of sensory evidence simplify to updating these two parameters. We derived the parameter  
123 update dynamics by a technique called projection filtering<sup>20,21</sup>, resulting in

$$124 \quad d\mu_t = v_t dt + \frac{\sqrt{2\kappa_z dt}}{\kappa_t} \sin(z_t - \mu_t), \quad (1)$$

$$125 \quad d\kappa_t = -\frac{f(\kappa_t)}{2\kappa_v} \kappa_t dt + \sqrt{2\kappa_z dt} \cos(z_t - \mu_t). \quad (2)$$

126 Here,  $f(\kappa_t)$  is a monotonically increasing nonlinear function that controls the speed of decay of  
127 one's certainty  $\kappa_t$  (see Eq. (10) in Methods). Equations (1) and (2) together define an algorithm  
128 that we call the **circular Kalman filter** (circKF)<sup>21</sup>. The circKF provides a general solution for  
129 estimating the evolution of a circular variable over time from noisy data.

130 To provide intuition for the filter's operation, let us represent the belief parameters in their polar  
131 coordinate form as a vector on the 2D plane (Fig. 2b inset). Then, the vector's direction determines  
132 the mean HD estimate  $\mu_t$ , and its length the precision  $\kappa_t$ . Let us now consider how this vector is  
133 updated in light of angular velocity and absolute head direction observations.

134 **Angular velocity observations.** Without absolute head direction observations, i.e.,  $\kappa_z = 0$ , the  
135 HD estimate  $\mu_t$  is fully determined by integrating angular velocity observations  $v_t$  over time, i.e.,  
136 angular path integration (Fig. 2c). In our vector representation, angular velocity information (the  
137  $v_t dt$  term in Eq. (1)) rotates the brain's HD belief by adding a tangential vector (Fig. 2c, green  
138 vector). The increasing error from such angular path integration comes with an associated drop  
139 in the belief's certainty  $\kappa_t$  ( $f(\kappa_t)$ -related term in Eq. (2)), which causes the belief vector to shrink  
140 (Fig. 2c, bottom). Interestingly, angular velocity observations always decrease certainty. The  
141 decrease might be more modest for more precise velocity observations (i.e.,  $\kappa_v$  large), but  
142 nonetheless persists. Thus, if only angular velocity observations are present, the posterior

143 certainty  $\kappa_t$  will inevitably decay towards zero (uniform posterior distribution, i.e., complete lack  
144 of knowledge), with a speed of decay that is determined by the angular velocity observation's  
145 "informativeness"  $\kappa_v$ .

146 **Absolute head direction observations.** Absolute HD information, like observing a visual  
147 landmark, directly informs about the current HD, and thus calibrates the internal HD estimate. To  
148 weigh the reliability of such information against the current HD estimate's certainty, its impact in  
149 Eqs. (1) and (2) is scaled by  $\kappa_z$ : if the cue's reliability  $\kappa_z$  is large, the observation  $z_t$  will  
150 substantially change the mean  $\mu_t$  towards the direction of the cue. Conversely, if the current  
151 certainty  $\kappa_t$  is large compared to the cue's reliability, an absolute HD observation  $z_t$  will hardly  
152 update the existing estimate. In vector form, this weighting by reliability corresponds to adding an  
153 absolute HD information vector to the current belief vector (Fig. 2d/f; see Methods). The direction  
154 and length of this HD information vector are determined by the observation's position  $z_t$  and  
155 reliability  $\kappa_z$ , respectively (Fig. 2d, blue vector). Depending on how well the observation is aligned  
156 with the current belief (as measured by the cosine in Eq. (2)), the certainty  $\kappa_t$  can either increase  
157 or, in the case of a strongly conflicting stimulus, even *decrease* (Fig. 2e). This interesting result is  
158 a consequence of the circular nature of the inference task<sup>22</sup>, and stands in contrast to the Kalman  
159 filter where absolute information *always* increases the estimate's certainty<sup>23</sup>. It is thus a key  
160 distinction between the Kalman filter and the circKF.

161 In a dynamic setting, both angular velocity and absolute HD observations are available as a  
162 continual stream. That is, at every point in time, the belief is updated according to Eqs. (1) and  
163 (2). In summary, angular velocity observations rotate the HD estimate and reduce certainty.  
164 Absolute HD observations, in contrast, update the HD estimate weighted by their reliability, and  
165 either increase certainty (if compatible with the current belief) or reduce certainty (if strongly  
166 conflicting with the current belief). These operations are continuously repeated to bring the current  
167 belief in line with the latest observations.

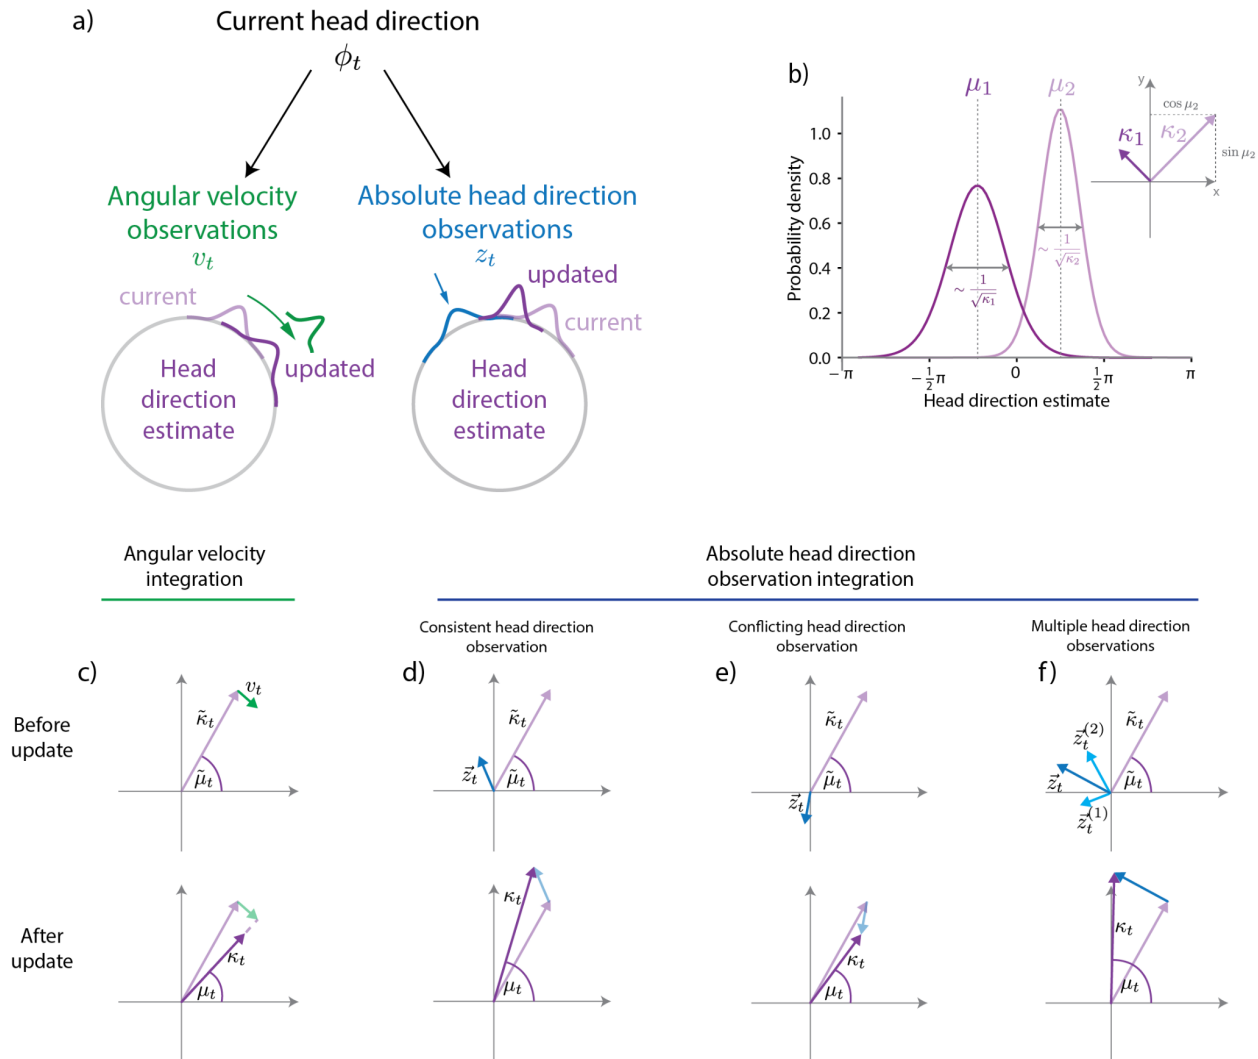

168

## 169 **Figure 2. Tracking circular variables with the circular Kalman filter.**

170 The circular Kalman filter performs dynamic Bayesian inference for circular variables. Its operation  
 171 is illustrated here for tracking HD.

- 172 a) Two different types of observations inform the brain's estimated head direction  $\phi_t$ : angular  
 173 velocity observations  $v_t$  (green) provide noisy information about the true angular velocity  
 174  $\dot{\phi}_t$ , with precision  $\kappa_v$  (larger = more reliable), and absolute HD observations  $z_t$  (blue)  
 175 provide noisy information about the true HD  $\phi_t$ , with precision  $\kappa_z$  (larger = more reliable).  
 176 b) At every point in time, the belief  $p(\phi_t | v_{0:t}, z_{0:t})$  about HD is approximated by the unimodal  
 177 von Mises distribution, the Gaussian equivalent for circular variables. It is fully  
 178 characterized by its mean parameter  $\mu_t$ , which determines the position of the mode, and  
 179 its precision parameter  $\kappa_t$ , which determines our belief's certainty. Interpreted as the polar  
 180 coordinates in the 2D plane, these parameters provide a convenient vector representation  
 181 of the belief (inset).  
 182 c) Angular velocity observations  $v_t$  rotate the current belief vector in the direction of the  
 183 observations (angular path integration). Error accumulation from angular path integration

- 184 comes with an associated drop in certainty and a corresponding drop in the vector's length  
185 (top vs. bottom).
- 186 d) Integrating absolute HD observations corresponds to adding the absolute HD observation  
187 vector (cyan) to the current belief vector (purple).
- 188 e) Absolute HD observations that are in conflict with the current belief (e.g., >120deg from  
189 the current estimate) result in a shortening of the belief vector (top vs. bottom) and an  
190 associated reduction of the belief's certainty.
- 191 f) Integration of multiple absolute HD cues, such as wind and vision, can be considered as  
192 a sum of multiple observation vectors.

## 193 Neural encoding of HD estimate and uncertainty

194 To link our ideal observer model to neural networks, we need to specify how the model's belief  
195 might be encoded by this activity pattern. In other words, we need to link our "algorithmic model"  
196 to a network model. Consider a ring attractor network where the peak of a localized increase in  
197 activity, or *bump*, encodes the estimate  $\mu_t$  of the circular variable -- here, HD<sup>7,24</sup>. Here we assume  
198 that the bump's amplitude scales with the encoded certainty  $\kappa_t$ . This assumption is supported by  
199 some experimental evidence from the head direction system<sup>10,25,26</sup>. In any network where this  
200 assumption is correct, the activity of a neuron  $i$  with preferred head direction  $\phi_i$  can be written as  
201 (Fig. 3a)

$$202 \quad r_t^{(i)} = \kappa_t \cos(\phi_i - \mu_t) + \text{other components} \quad (3)$$

203 where  $\mu_t$  and  $\kappa_t$  are the encoded belief's mean and certainty, and the "other components" might  
204 be a finite activity baseline or minor contributions of higher-order Fourier components to the  
205 activity. Note that Eq. (3) does *not* imply that the tuning curve must be cosine-shaped. Rather, it  
206 implies that the cosine component of the tuning curve is modulated by certainty. This is  
207 satisfied, for example, by any unimodal bump profile (as the one in Fig. 2a) whose overall gain  
208 is governed by certainty. A particularly interesting case that matches Eq. (3) is a linear  
209 probabilistic population code<sup>27,28</sup> with von Mises-shaped tuning curves and independent Poisson  
210 neural noise (see SI text and Fig. S1).

211 This simple encoding scheme allows the network to encode both mean estimate  $\mu$  and associated  
212 certainty  $\kappa$ , as required for implementing the Bayesian update rules (Eqs. (1) and (2)). Moreover,  
213 the natural parameters of the von Mises belief,  $\theta_1 = \kappa_t \cos(\mu_t)$  and  $\theta_2 = \kappa_t \sin(\mu_t)$ , can be  
214 recovered by taking a weighted sum of the neural population's activity (Methods). This makes  
215 these parameters accessible to downstream neurons via simple (linear) neural operations.

216 Interestingly,  $\theta_1$  and  $\theta_2$  represent the von Mises distribution in terms of Cartesian vector  
217 coordinates in the 2D plane, whereas  $\mu$  and  $\kappa$  are its polar coordinates (cf. Fig. 2b). Such a  
218 representation is related to the phasor representation of neural activity<sup>29</sup>, which also translates  
219 bump position and amplitude to polar coordinates in the 2D plane (Fig. 3b). Since in our model  
220 the activity bump is scaled by certainty, the phasor representation of neural activity equals the  
221 vector representation of the von Mises distribution (Fig 3b,c).

222 Based on our ideal observer model (our “algorithmic model”), we know the vector operations  
 223 required to implement the circular Kalman filter (Fig 2c-f). Thus, in what follows, we make use of  
 224 this equality to implement the operations of the ideal observer model through neural dynamics. In  
 225 other words, we show how the circkf algorithm could be implemented by a neural network.

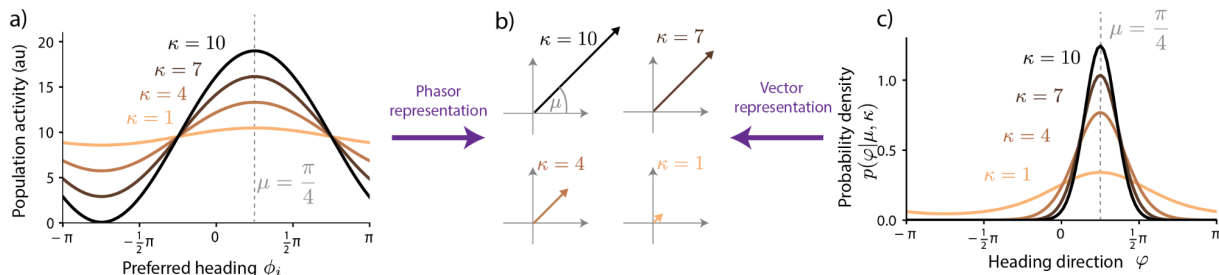

226

227 **Figure 3. Encoding the HD belief in neural population activity.**

- 228 **a)** Neural population activity profile (e.g., average firing rate) encoding the HD estimate  $\mu =$   
 229  $\pi/4$  with different values of certainty  $\kappa$ . Neurons are sorted by preferred head directions  
 230  $\phi_i$ .  
 231 **b)** Vector representation of estimate  $\mu = \pi/4$  for different values of certainty  $\kappa$ . This vector  
 232 representation can be obtained by linearly decoding the population activity in a) (“phasor  
 233 representation”). It also corresponds to the vector representation of the von Mises  
 234 distribution in c), and thus connects neural activities with the probability distributions they  
 235 encode.  
 236 **c)** Von Mises probability densities for different values of certainty  $\kappa$  and fixed HD estimate  
 237  $\mu = \pi/4$ . Note that, unlike the population activity in a), the density sharpens around the  
 238 mean with increasing certainty.

239 **Recurrent neural networks can track Bayesian HD estimates**

240 Linking the belief parameters to neural population activity (Eq. (3)) reveals the population activity  
 241 dynamics required to implement our ideal HD tracking model (Eqs. (1) & (2)). We now ask how  
 242 these dynamics can be implemented by a recurrent neural network (RNN). We start with an  
 243 idealized network with a single neural population, similar to many generic ring attractor networks  
 244 (e.g., refs<sup>3,7</sup>). Later, we will build on this idealized network to construct a more distributed network  
 245 that satisfies the known constraints of a biological ring attractor that encodes HD.

246 Simple and analytically accessible network dynamics that implement the circular Kalman filter  
 247 (Eqs. (1) & (2)) are of the form

248 
$$\dot{\mathbf{r}}_t = -\frac{1}{\tau}\mathbf{r}_t - g(\mathbf{r}_t)\mathbf{r}_t + W \cdot \mathbf{r}_t + \mathbf{I}_t^{\text{ext}}, \quad (4)$$

249 where  $r_t$  denotes a vector of neural activities, with neurons ordered by their preferred head  
 250 directions  $\varphi^{(i)}$ ,  $\tau$  is the network time constant (leak),  $W$  is the recurrent connectivity matrix, and  
 251  $I_t^{\text{ext}}$  is a vector of external inputs to the network. The synaptic inhibition nonlinearity  $g(r_t)$  is



252 closely related to the nonlinearity  $f(\kappa_t)$  in Eq. (2): it is tuned such that its output increases with  
253 bump amplitude, and thus implements nonlinear global inhibition.

254 The network dynamics in Eq. (4) allow us to attribute specific wiring patterns (or motifs) to the  
255 effect they have on the population activity vector, mimicking the transformations required to  
256 implement computations in the circKF (Fig. 2c,d). In particular, probabilistic angular path  
257 integration is implemented by an interplay between recurrent connectivity ( $W$ ), leak ( $1/\tau$ ), and  
258 synaptic inhibition ( $g(r_t)$ ). The matrix of recurrent connectivity  $W$  can be divided into symmetric  
259 (even) and asymmetric (odd) components (Fig. 4a). The even component holds the bump of  
260 activity at its current location in the absence of any other input. Meanwhile, the odd component  
261 can push the bump of activity around the ring -- e.g., in response to an angular velocity  
262 observation (Fig. 4b). Leak and global inhibition together cause the amplitude of the bump to  
263 decay over time (Fig. 4c), corresponding to the progressive decay in certainty in the absence of  
264 new HD information. Absolute HD observations enter the network via the external input vector  
265  $I_t^{ext}$ , in form of a cosine-shaped bump with amplitude modulated by perceptual reliability  $\kappa_z$  (Fig.  
266 4d). This input activity effectively implements the vector addition required for proper absolute HD  
267 observation integration. Then, the external information's weight is determined by the ratio  
268 between input amplitude and bump amplitude, in line with the weighting between cue reliability  
269 and own certainty required by the circKF. Bump position and amplitude dynamics derived from a  
270 network with these basic motifs well-approximate the parameter dynamics of the circKF (Eqs. (1)  
271 & (2); Fig. 4e; see Eqs. (13) & (14) in Methods for bump parameter dynamics).

272 In the limit of infinitely many neurons, the network can even be tuned to implement the circKF  
273 exactly. Importantly, a network that exactly implements the circular Kalman filter is *not* a ring  
274 attractor network: in the absence of external absolute HD input,  $I_t^{ext} = 0$ , the activity bump decays  
275 towards its single attracting state with zero amplitude (Fig. 4e). In contrast, ring attractor networks  
276 commonly settle on a constant activity bump with non-zero amplitude (the "attractor state") if input  
277 is removed. In our "exact inference" network, activity decay is by design, and reflects the  
278 continuously decreasing certainty arising from pure angular path integration in the absence of  
279 absolute HD observations.

280 Activity dynamics change qualitatively if we choose  $g(r_t)$  such that the second term in Eq. (4)  
281 becomes a quadratic function of the bump amplitude (quadratic inhibition). This change in  $g(\cdot)$   
282 introduces ring attractor states with non-zero network activity, and has the additional advantage  
283 of making the network dynamics analytically accessible (see Methods). As a result, we can tune  
284 the network parameters such that this network implements **a quadratic approximation** to the  
285 circKF. This approximation becomes precise in the limit of large posterior certainties  $\kappa_t$ . In other  
286 words, the bump's amplitude dynamics will correctly reflect the posterior's certainty for large bump  
287 amplitudes, but will deviate from it in the small-certainty/small-amplitude limit.

288 Such a Bayesian ring attractor has two operating regimes: a regime close to the attractor state  
289 with constant, low bump amplitude, encoding approximately constant certainty, and a dynamic,  
290 high amplitude regime away from the attractor state, where the network correctly implements  
291 dynamic Bayesian inference. Numerical simulations confirm the existence of these two regimes:  
292 the network tracks the HD estimate and its associated certainty just like the circular Kalman filter

293 in the dynamic regime, but features a slightly lower HD tracking precision, and overestimates its  
294 confidence, close to the attractor state (Fig. 4f, orange vs. blue; SI Fig. S2 shows that performance  
295 is largely independent of ring attractor population size). We will analyze these two regimes further  
296 in the next section.

297 In summary, the following three network motifs support the implementation of Bayesian inference  
298 in ring attractor networks (Fig. 4b-d): (i) asymmetric (odd) recurrent connectivity with strength  
299 modulated by angular velocity observations  $v_t$ , (ii) global inhibition that is approximately quadratic  
300 in bump amplitude, and (iii) a cosine-shaped external input at the position of the absolute HD  
301 observation, whose strength is modulated by the reliability  $\kappa_z$  of this observation. Motifs (i) and (ii)  
302 implement probabilistic angular path integration, whereas motif (iii) updates the network's current  
303 HD estimate in light of uncertain absolute HD observations. Interestingly, these motifs are  
304 common in many generic ring attractor networks, and have been discussed in terms of their  
305 function individually (see e.g. refs<sup>7,30</sup>). Here, we show that, together, they can implement  
306 approximate dynamic Bayesian inference for circular variables - inference that becomes more  
307 precise in the limit of large amplitudes, away from the attractor state.

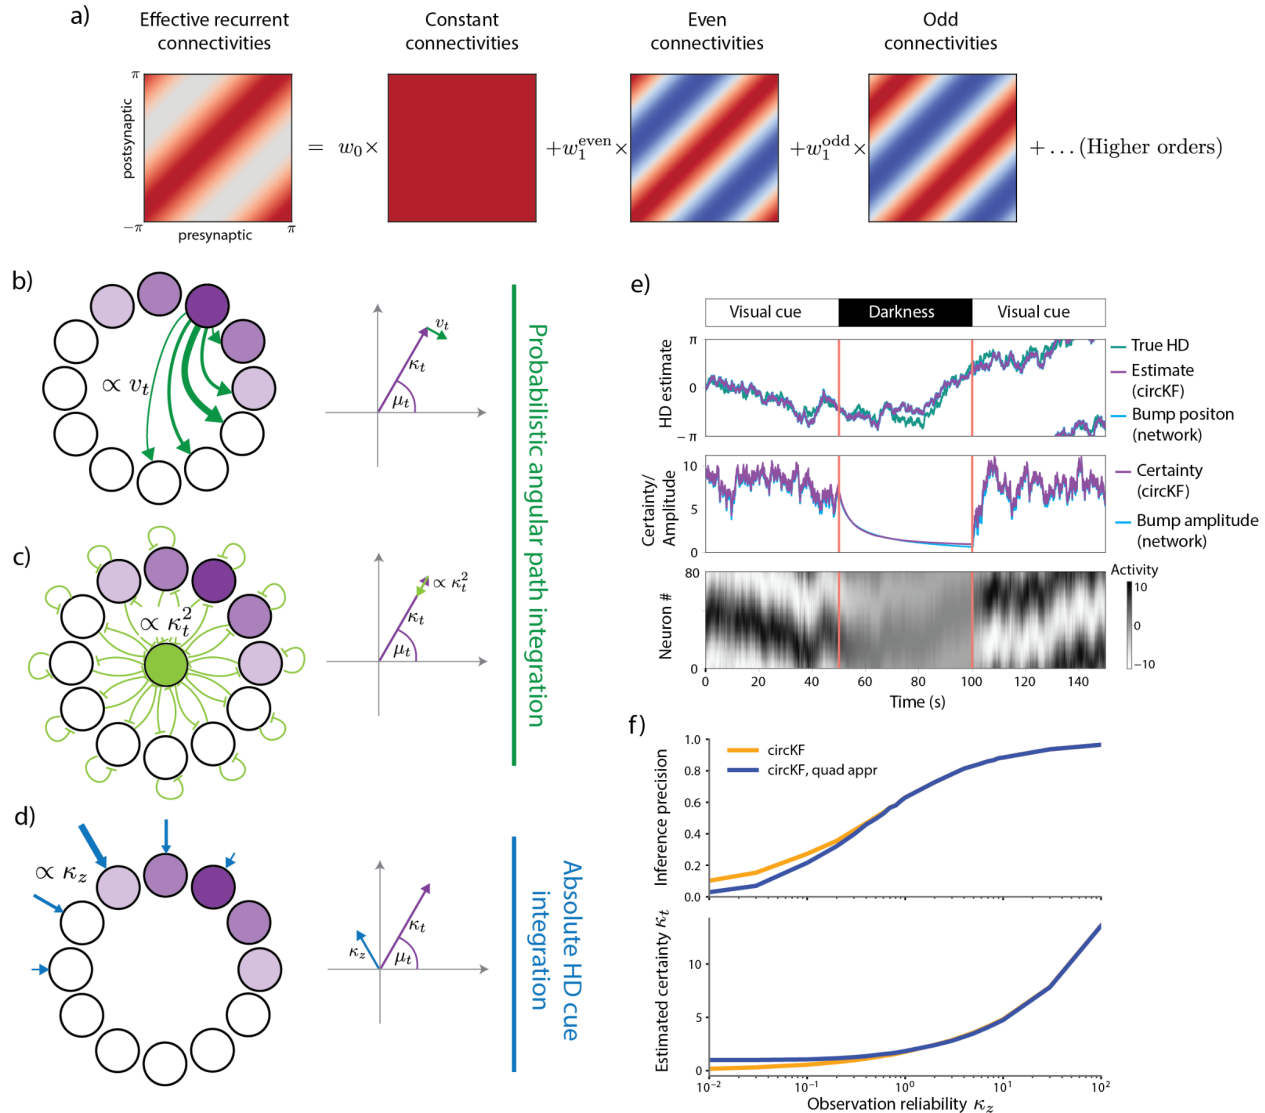

308

309 **Figure 4. A recurrent neural network implementation of the circular Kalman filter.**

- 310 a) Rotation-symmetric recurrent connectivities (here: neurons are sorted according to their
- 311 preferred HD) can be decomposed into constant, cosine-shaped (even), sine-shaped
- 312 (odd) and higher-order frequency components (basis function). Red and blue denote
- 313 excitatory and inhibitory components, respectively.
- 314 b) Network motifs sufficient to implement the circular Kalman filter (b-d). Rotations of the HD
- 315 estimate are mediated by sine-shaped (or odd) recurrent connectivities, whose strength
- 316 is modulated by angular velocity observations.
- 317 c) Decay in amplitude arises from leak and global inhibition.
- 318 d) A cosine-shaped input to the network provides external absolute HD cue input. The
- 319 strengths of this input is modulated by observation reliability  $\kappa_z$ .
- 320 e) The dynamics of the network implement the dynamics of the ideal observer's belief, as
- 321 shown in a simulation of a network with 80 neurons. Here, we assume that vision provides
- 322 the network with absolute HD information. When a 'visual cue' was present, both absolute

323 HD observations and angular velocity observations were available. During ‘darkness’, only  
324 angular velocity observations were available.

325 f) The network implementation with quadratic leak approximation (circKF, quadratic approx)  
326 tracks the HD estimate with the same precision (top; higher = lower circular distance to  
327 true HD) as the circular Kalman filter (circKF, Eqs. (1) and (2)) if absolute HD observations  
328 are reliable (large  $\kappa_z$ ), but with slightly lower precision once they become less reliable  
329 (small  $\kappa_z$ ). This drop co-occurs with an overestimate in the estimate’s confidence  $\kappa_t$   
330 (bottom). Plots are averages over 5’000 simulations (see Methods for simulation details).

### 331 Ring attractors approximate Bayesian inference for HD tracking through 332 amplitude dynamics

333 Our Bayesian ring attractor network qualitatively differs in two ways from classical ring attractor  
334 networks for working memory<sup>1,7,31</sup>. First, classical networks are not explicitly designed to represent  
335 uncertainty, and therefore assign no interpretation to their bump’s amplitude. Second, ring  
336 attractors are usually designed to operate close to their attractor states, where the bump  
337 amplitude tends to vary little. We now ask how important it is for network activity - including bump  
338 amplitude - to deviate from these attractor states to implement Bayesian inference.

339 Our RNN with quadratic inhibition is a ring attractor network that exhibits attracting states with a  
340 finite amplitude. In networks of such structure, bump position changes upon absolute HD inputs  
341 in proportion to the ratio between input amplitude ( $\triangleq$  reliability of absolute HD cue) and bump  
342 amplitude ( $\triangleq$  own certainty) (see Eq. (13) in Methods). Jointly tuning the network parameters, in  
343 particular recurrent weights, network time constant, and inhibitory weights, allows us to change  
344 the bump amplitude dynamics (Eq. (15) in Methods) to explore different regimes of network  
345 operation. Specifically, we tuned the network parameters to modulate two amplitude  
346 characteristics. The first is the attractive amplitude fixed point  $\kappa^*$  of the population activity bump  
347 (specified by the parameter  $\kappa^*$ , which defines both the bump amplitude and the uncertainty it  
348 encodes). The second is the effective decay speed  $\beta$ , which describes how fast the amplitude  
349 approaches this fixed point (larger  $\beta$  implies faster dynamics, Fig. 5a).

350 In the limit of fast dynamics,  $\beta \rightarrow \infty$ , the network becomes a “strict attractor” with a bump  
351 amplitude that never moves away from its fixed point. As the bump amplitude encodes the HD  
352 estimate’s uncertainty, such a strict attractor never updates its uncertainty, and consequently  
353 lacks proper reliability weighting of absolute HD observations. In general, we expect that such a  
354 network is not able to estimate HD as accurately as one that correctly implements Bayesian  
355 inference, as it does not properly account for the observation’s reliability. Strict attractors with a  
356 numerically optimized fixed point amplitude  $\kappa^*$  (Fig. 5b inset) can still perform HD estimation  
357 reasonably well (Fig. 5b, green curve), but perform systematically worse than the tuned network  
358 (Fig. 5b, circKF with quadratic approximation, blue curve) or the circKF (Fig. 5b, orange curve).  
359 Here, we measure performance by how much the estimate (bump position) deviates on average  
360 from the ground-truth HD (circular average distance, see Methods). Adjusting the fixed point  
361 amplitude for each level of information reliability *individually* further boosted the network’s

362 estimation performance, and effectively re-established proper Bayesian reliability weighting of  
363 incoming absolute HD observations, similar to the circKF (Fig. 5c). Even then, strict attractors lack  
364 temporal adjustment of their internal certainty estimates, as required by Bayes-optimal evidence  
365 integration.

366 We next asked whether we could increase performance by loosening the attractor. Such a  
367 relaxation would permit the network to operate farther away from its attracting state, to which it  
368 will decay in the absence of absolute HD observations (the dynamics that implement the quadratic  
369 approximation of the circKF are a special case of this network, see Fig. 5a). Indeed, the slower  
370 dynamics (slower decay speed  $\beta$ ) of such a “loose attractor” boosted overall performance (Fig.  
371 5d). In fact, with network parameters tuned numerically to maximize performance, HD estimation  
372 performance becomes practically indistinguishable from that of the ideal Bayesian observer (light  
373 blue dot in Fig. 5d, light blue line in Fig. 5e). In this regime, the HD estimate and bump amplitude  
374 dynamics become almost identical to the dynamics of certainty representations in the circKF. On  
375 the other hand, more rigid networks with faster decay speed  $\beta$  (such as the strict attractor as an  
376 extreme case) clearly deviate from the circKF, despite optimized fixed-point values (Fig. 5e).  
377 Interestingly, the optimal network parameters do not necessarily coincide with the quadratic  
378 approximation of the circKF, which we found by analytically matching the certainty dynamics in  
379 the large-certainty limit rather than by numerical optimization. In fact, a wide range of network  
380 parameters lead to a relatively small performance loss (<10%, Fig. 5d). Therefore, accurate  
381 parameter tuning might be unnecessary, as long as the network dynamics remain sufficiently  
382 slow.

383 Overall, this demonstrates that proper HD estimation relies on weighting absolute HD  
384 observations both globally (Figs. 5 b,c), i.e. according to the average level of reliability, and  
385 dynamically (Figs. 5d,e), according to the dynamics of one’s own certainty. Nonetheless,  
386 reasonable performance can be achieved over a wide range of network parameters. This may  
387 indicate a “built-in” implicit reliability weighting in attractor networks through their amplitude  
388 dynamics. As we just demonstrated, this requires sufficiently slow attractor dynamics around the  
389 fixed point and the possibility for deviations from the attractor state. This may explain why ring  
390 attractor networks perform evidence integration reasonably well in practice, even though they are  
391 unlikely to be precisely tuned to the task.

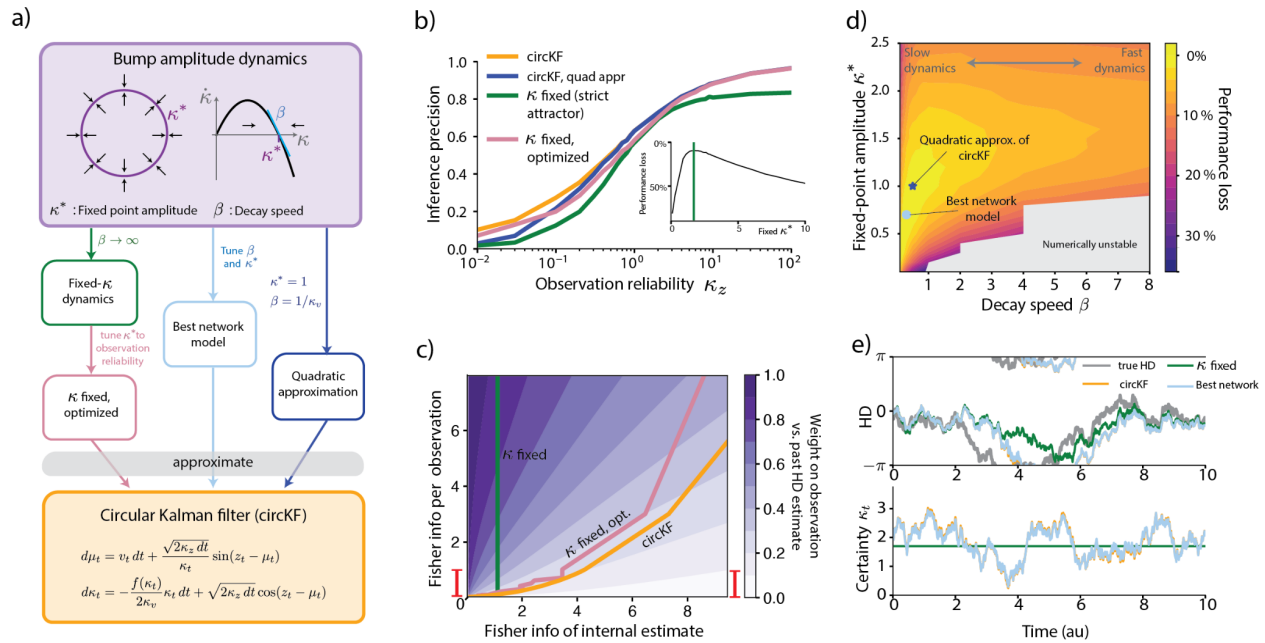

392

393

### Figure 5. Attractor models with slow dynamics approximate Bayesian inference

394

**a)** A linear RNN with quadratic inhibition can operate in different regimes. Its bump amplitude dynamics can be characterized by fixed point amplitude  $\kappa^*$  and decay speed  $\beta$ . Note that the bump position dynamics is described by the same equation across all compared regimes (Eq. (13) in Methods). However, the position dynamics depend on bump amplitude, whose dynamics differ across regimes (Eq. (15) in Methods). This causes HD tracking behavior to differ across network regimes.

395

396

397

398

399

400

**b)** HD estimation performance as measured by inference precision (as defined by  $1 - \text{circVar}$ , see Methods). Here, the blue curve shows performance of the analytically tuned ring attractor network, implementing the quadratic approximation to the circKF (yellow). For the strict attractor (green curve), we chose  $\kappa^*$  to numerically maximize performance averaged across all levels of observation reliability, weighted by a prior  $p(\kappa_z)$  on this reliability (see Methods). For the optimized, but still strict, network (pink curve), we found the performance-maximizing  $\kappa^*$  separately for each level of observation reliability.

403

404

405

406

407

**c)** The weight with which a single observation contributes to the HD estimate varies with informativeness of both the absolute HD observations and the current HD estimate. We here illustrate this for an absolute HD observation that is orthogonal to the current HD estimate, resulting in the largest possible estimate change ( $|z_t - \mu_t| = 90\text{deg}$  in Eq. (1)). The weight itself quantifies how much the observation impacts the HD estimate as a function of how informative this observation is (vertical axis, measured by Fisher information of a 10ms observation) and our certainty in the HD estimate (horizontal axis, also measured by Fisher information) before this observation. A weight of one implies that the observation replaces the previous HD estimate, whereas a weight of zero implies that the observation does not impact this estimate. The close-to-optimal update weight of the circKF (yellow) forms a nonlinear curve through this parameter space. Fisher information per observation is directly related to the observation reliability  $\kappa_z$ , and the vertical red bar shows the equivalent range of observation reliabilities,  $\kappa_z \in [10^{-2}, 10^2]$ , shown in panel b.

409

410

411

412

413

414

415

416

417

418

419

420 Update weights for the tuned network (circKF with quadratic approximation) are not shown  
421 as they would be visually indistinguishable from that of the circKF, and only deviate from  
422 it for very uninformative observations (see SI Fig. S3).

423 **d)** Overall inference performance loss (compared to a particle filter; performance measured  
424 by avg. inference precision, as in **b**, 0%: same average inference precision as particle  
425 filter, 100%: average. inference precision = 0), averaged across all levels of observation  
426 reliability (weighted by prior  $p(\kappa_z)$ , see Methods) as a function of the bump amplitude  
427 parameters  $\kappa^*$  and  $\beta$ . For too small fixed point amplitudes and too fast dynamics,  
428 numerical simulations become unstable (grey area).

429 **e)** Simulated example trajectories of HD estimate/bump positions of HD estimate/bump  
430 positions (top) and certainties/bump amplitudes (bottom). To avoid cluttering, we are not  
431 showing the quadratic approximation of the circKF (visually indistinguishable from circKF  
432 and best network).

### 433 A biological ring attractor can implement the circular Kalman filter

434 Having established the network motifs sufficient for implementing dynamic Bayesian inference in  
435 ring attractor networks, and the network parameter regimes that lead to good HD tracking  
436 performance, we finally asked if biological networks are in principle able to implement such  
437 inference. A biological implementation is plausible because the critical motifs of our model  
438 networks are actually common in many generic ring attractor networks. The most well-studied  
439 biological ring attractor network is the HD system of the fruit fly *Drosophila*<sup>13</sup>. Here we show how  
440 the motifs of this network -- and, by extension, any biological ring attractor network -- could  
441 potentially implement dynamic Bayesian inference.

442 The ring attractor in the *Drosophila* HD system is composed of three core cell types, called EPG,  
443 PEN1 and  $\Delta 7$  neurons<sup>32-34</sup>, cf. Fig. 6a-c. Head direction is represented as a bump of neural activity  
444 in the EPG population<sup>12</sup>. These neurons are recurrently connected with excitatory PEN1 neurons.  
445 When the fly turns, this differentially activates PEN1 neurons in the right and left brain  
446 hemispheres, and because PEN1 neurons have asymmetric (shifted) projections back to EPG  
447 neurons, they can rotate the bump of EPG activity in accordance with the fly's rotation<sup>14,35</sup>. This  
448 motif effectively establishes the velocity-modulated odd recurrent connectivity required to initiate  
449 turns in ring attractor networks (Fig. 6d). Moreover, EPG neurons are recurrently connected with  
450 inhibitory  $\Delta 7$  neurons, which establishes broad inhibition (Fig. 6e). Finally, EPG neurons receive  
451 inhibitory inputs from so-called ER neurons, which send absolute HD information to EPG  
452 neurons<sup>36-38</sup> (Fig. 6f). In summary, the fly's HD system is equipped with the basic motifs to  
453 implement a Bayesian ring attractor.

454 To demonstrate that these motifs can in principle implement a Bayesian ring attractor, we  
455 analytically tuned the relative connection strength between (rather than within) the populations of  
456 our idealized network in Fig. 6c such that the dynamics of the bump parameters in the HD  
457 population implement the quadratic approximation to the circKF (see Eqs. (16)-(20) in Methods  
458 for network dynamics, SI for derivation). To achieve this, we additionally assumed that the broad  
459 inhibition implemented by the inhibitory population (Fig. 6c,e) was achieved by a subtractive signal  
460 that resulted from a multiplicative interaction between activities of INH and HD neurons. This

461 multiplicative interaction achieves the quadratic certainty decay required to approximate the  
 462 circKF. We found that this network achieves a HD tracking performance indistinguishable to that  
 463 of our idealized Bayesian ring attractor network (SI Figure S4). Thus, even when we add the  
 464 constraints dictated by the actual connectivity patterns of neural networks in the brain, the  
 465 resulting network is still able to implement dynamic Bayesian inference.

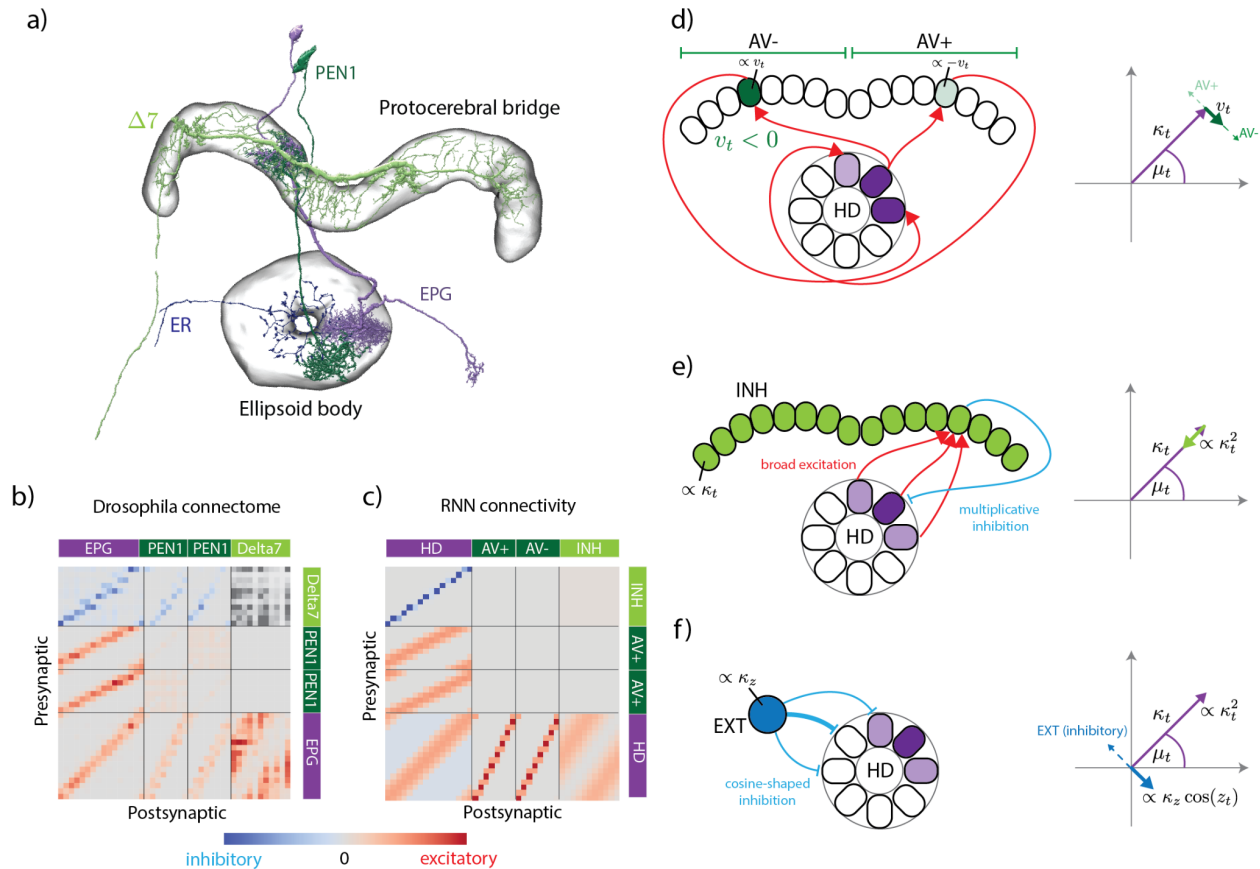

466

467

**Figure 6. A *Drosophila*-like network implementing the circular Kalman filter.**

468

469

**a)** Cell types in the *Drosophila* brain that could contribute to implementing the circular Kalman filter.

470

471

472

473

474

475

476

477

478

479

480

481

482

**b)** Connectivity between EPG,  $\Delta 7$  and PEN1 neurons, as recovered from the hemibrain:v1.2.1 database<sup>33</sup>. ER neurons were omitted because they only form the inputs to the recurrently connected ring attractor. Here, neurons were grouped according to anatomical region as a proxy for preferred HD, and we used the total number of synaptic connections between two neurons to indicate connection strength.  $\Delta 7$  to  $\Delta 7$  connectivities are omitted, as the polarity of these connections (inhibitory or excitatory) remains unclear.

**c)** The RNN connectivity profile that implements an approximation of Bayesian inference algorithm is strikingly similar to the connectivity of neurons in the *Drosophila* HD system. To avoid confusion with actual neurons, we refer to the neuronal populations in this idealized RNN as head direction (HD), angular velocity (AV+ and AV-, in reference to the two hemispheres), inhibitory (INH) and external input (EXT) populations.

**d)** Differential activation of AV populations (left/right: high/low) in the two hemispheres as well as a shifted feedback connectivity from AV to HD populations effectively implement



- 483 the odd (or shifted) connectivity needed to turn the bump position (here: clockwise shift  
484 for anti-clockwise turn).
- 485 e) Broad excitation of the INH population by the HD population, together with a one-to-one  
486 multiplicative interaction between INH and HD population, implement the quadratic decay  
487 of the bump amplitude needed for the reduction in certainty arising from probabilistic path  
488 integration.
- 489 f) External input is mediated by inhibiting HD neurons with preferred direction *opposite* the  
490 location of the absolute HD observation, effectively implementing a vector sum of belief  
491 with absolute HD input.

## 492 Discussion

493 We have shown that ring attractor networks - prominent models for working memory of circular  
494 variables - can encode and compute with a sense of uncertainty, even when their attractor states  
495 are unable to do so. They can achieve this by operating in a dynamic regime away from these  
496 attractor states. In this regime, their bump amplitude can vary and thus can encode uncertainty.  
497 Such deviations from the attractor state are only possible in loose attractors with sufficiently weak  
498 connectivity strengths. Stronger connectivity leads to strict attractors that operate closer to their  
499 attractor states and feature worse performance. For a canonical working memory of a circular  
500 variable - our sense of head direction - we have shown that network motifs common to ring  
501 attractor networks are sufficient to implement the basic computations for dynamic Bayesian  
502 inference: (i) angular velocity-modulated odd recurrent connectivities implement incremental  
503 changes to the HD estimate, (ii) global inhibition implements the required decay in certainty over  
504 time, and (iii) reliability-modulated external input implements reliability-weighted absolute HD  
505 integration. We expect these findings to translate to working memories of other circular variables,  
506 like those that follow circadian rhythms, or encode memory about visual orientations<sup>5,39</sup>. We  
507 further found that close-to-optimal estimation does not require exact tuning of the ring attractor  
508 network's connectivities, as long as the networks feature the aforementioned motifs and are  
509 flexible enough to deviate from their attractor states. Lastly, we demonstrated that a network with  
510 realistic biological constraints still supports the implementation of such a Bayesian ring attractor.  
511 Our findings thus suggest that ring attractor models can implement Bayesian computations for  
512 working memory.

513 A key element of our approach is the representation of uncertainty as the amplitude of a neural  
514 activity bump. This differentiates our work from recent network models that only performed  
515 reliability-weighted cue integration at the level of the inputs<sup>40,41</sup>, without considering the resulting  
516 certainty of the HD estimate. In our framework, this certainty determines the weight with which  
517 new external evidence enters the estimate through the bump amplitude. As such, it plays a central  
518 computational role for updating the estimate, rather than being a passive measure of  
519 precision<sup>25,26</sup>. It predicts that the speed with which the activity bump reacts to changing absolute  
520 HD observations should depend on the HD estimation's certainty, and thus bump amplitude: low  
521 bump amplitudes (low certainty) should lead to rapid bump shifts, whereas high bump amplitudes  
522 (high certainty) show lead to slower ones. Recent experimental evidence<sup>10</sup> suggests that bump

523 amplitude varies in navigating rodents, and this amplitude modulates the speed with which their  
524 HD system reacts to changing absolute HD observations - in line with our predictions.

525 By restricting ourselves to an analytically tractable ring attractor network, we were able to almost  
526 exactly map the certainty dynamics of the ideal-observer circKF to the bump amplitude dynamics.  
527 Having the network implement the circKF rather than a standard Kalman filter fully accounts for  
528 the circular symmetry of HD estimation. Thus, unlike previous work<sup>23</sup>, our network does not suffer  
529 from imprecise inference once absolute HD observations strongly deviate from the current HD  
530 estimate. As a result, it yields fundamentally different predictions for strongly conflicting absolute  
531 HD direction cues (Fig. 1e). Specifically, since in the circular Kalman filter a conflicting absolute  
532 observation (>90 deg from the current estimate) could yield a reduction in certainty, our network  
533 dynamics would predict a transient decrease in bump amplitude following a conflicting  
534 observation. Further, our network automatically adjusts its cue integration weights (Fig. 5c) to  
535 perform close-to-optimal Bayesian inference for absolute HD observations of varying reliability -  
536 from highly reliable to very unreliable or even completely absent observations. This stands in  
537 contrast to previous approaches<sup>42</sup>, that required hand-tuned weights to show that continuous ring  
538 attractors can track orientation and compute the running circular average of an absolute HD  
539 stimulus. Lastly, our network is to our knowledge the first to fully account for the effect of  
540 *probabilistic* angular path integration in a principled way: unlike, e.g., the disc attractor in ref<sup>43</sup>, the  
541 bump amplitude decay in our network matches the quadratic certainty decay of the ideal Bayesian  
542 observer in absence of absolute HD observations. We would expect to observe such a decay in  
543 biological ring attractors implementing Bayesian inference once absolute HD observations are  
544 removed.

545 Even though our Bayesian HD tracking algorithm requires keeping track of the HD estimate's  
546 uncertainty, we have shown that imperfectly tuned ring attractor networks can track head direction  
547 reasonably well. In fact, even strict attractor networks with a fixed amplitude, and fixed associated  
548 uncertainty, can perform close-to-Bayesian cue integration (Figs. 5b; cf. also ref<sup>44</sup>). This result  
549 raises the question of why neurons should encode uncertainty in the first place. First and foremost,  
550 for some animals, uncertainty influences their behavior directly to improve their performance (e.g.,  
551 refs<sup>45-47</sup>). As a prime example, the homing behavior of the desert ant<sup>48</sup> suggests that the  
552 performance gained from tracking one's uncertainty justifies the added complexity for doing so.  
553 Further, uncertainty appears to impact the neural encoding of other navigation-related variables.  
554 For example, when absolute visual cues are in conflict with path integration cues, grid cells in  
555 mouse medial entorhinal cortex are more likely to remap when the visual cues are more reliable<sup>49</sup>.  
556 Identifying how uncertainty ought to be reflected in their neural activity, as we do here, is required  
557 for a comprehensive understanding of the role of uncertainty in the brain's computations.

558 In summary, our work shows how ring attractors could implement dynamic Bayesian inference,  
559 even in networks that obey some biological constraints, such as the *Drosophila*'s HD system. We  
560 expect similar network motifs to be present in the HD systems of other animals, such as that of  
561 mice<sup>9,10</sup>, monkeys<sup>50</sup>, humans<sup>51</sup>, or even in systems that yield three-dimensional HD cells, as those  
562 of bats<sup>52</sup>. More generally, we demonstrated how classic network motifs, like those common in ring  
563 attractor networks, can perform close-to-optimal Bayesian inference when considered in

564 combination, and expect our results to generalize to other circular variables that are represented  
565 in ring attractor networks.

## 566 Acknowledgements

567 We thank Rachel Wilson for fruitful discussions and input throughout the whole research phase,  
568 and for her comments on the manuscript. We thank Habiba Noamany (Wilson lab, HMS) for  
569 assisting us navigating the neuprint database, and for informed comments on the manuscript.  
570 We would further like to thank Johannes Bill & Albert Chen (Drugowitsch lab, HMS) for  
571 discussions and feedback on the manuscript, Philipp Reinhard for going on a typo hunt in the  
572 SI, and the entire Drugowitsch lab for valuable and insightful discussions.

573 The work was funded by the NIH (R34NS123819; J.D.), the James S. McDonnell Foundation  
574 (Scholar Award #220020462; J.D.), the Swiss National Science Foundation (grant numbers  
575 P2ZHP2 184213 and P400PB 199242; A.K.), and a Grant in the Basic and Social Sciences by  
576 the Harvard Medical School Dean's Initiative award program (J.D.).

## 577 Author contributions

578 Conceptualization, A.K., M.A.B., J.D.; Methodology, A.K., J.D.; Software, A.K.; Formal analysis,  
579 A.K., J.D.; Investigation, A.K., M.A.B., J.D.; Resources, J.D.; Writing - Original Draft: A.K., J.D.;  
580 Writing - Review & Editing: A.K., M.A.B., J.D.; Visualization, A.K.; Supervision, J.D.; Funding  
581 Acquisition, A.K., J.D.

## 582 Declaration of interests

583 The authors declare no competing interests.

## 583 Methods

### 584 Ideal observer model: the circular Kalman filter

585 Our ideal observer model - the circular Kalman filter (circKF)<sup>21</sup> - performs dynamic Bayesian inference for circular variables. It computes the posterior probability of an unobserved (true) HD  
 586  $\phi_t \in [-\pi, \pi]$  at each point in time  $t$ , conditioned on a continuous stream of noisy angular velocity  
 587 observations  $v_{0:t} = \{v_0, v_{dt}, \dots, v_t\}$  with  $v_\tau \in \mathbb{R}$ , and absolute HD observations  $z_{0:t} = \{z_0, z_{dt}, \dots, z_t\}$   
 588 with  $z_\tau \in [-\pi, \pi]$ . Specifically, we assume that these observations are generated from some true  
 589 angular velocity  $\dot{\phi}_t$  and HD  $\phi_t$ , whose observations are corrupted by zero-mean noise at each  
 590 point in time, via  
 591

$$v_t | \dot{\phi}_t \sim \mathcal{N}\left(\dot{\phi}_t, \frac{1}{\kappa_v dt}\right), \quad (5)$$

$$z_t | \phi_t \sim \mathcal{VM}\left(\phi_t, \sqrt{2\kappa_z dt}\right). \quad (6)$$

592 Here,  $\mathcal{N}(\mu, \sigma^2)$  denotes a Gaussian with mean  $\mu$  and variance  $\sigma^2$ ,  $\mathcal{VM}(\mu, \kappa)$  denotes a von Mises  
 593 distribution of a circular random variable with mean  $\mu$  and precision  $\kappa$ , and  $\kappa_v$  and  $\kappa_z$  denote the  
 594 precision of the angular velocity and absolute HD observations, respectively. Note that as  $dt \rightarrow 0$ ,  
 595 the precision of both angular velocity and absolute HD observations approach 0, in line with the  
 596 intuition that reducing a time step size  $dt$  results in more observations per unit time, which should  
 597 be accounted for by less precision per observation to avoid "oversampling". More formally, the  
 598 square-root scaling of the absolute HD observation precision with  $\sqrt{2\kappa_z dt}$  ensures that the Fisher  
 599 information of the observations about the true HD scales linearly in time and  $\kappa_z$  in the continuum  
 600 limit  $dt \rightarrow 0$  (ref<sup>21</sup>, Theorem 2). The same applies to the  $dt^{-1}$  scaling of the Gaussian variance of  
 601 the angular velocity observations, again achieving a Fisher information that scales linearly in time.

602 To support integrating information over time, the model assumes that current HD  $\phi_t$  depends  
 603 on the past HD  $\phi_{t-dt}$ . Specifically, in absence of further evidence, the model assumes that HD  
 604 diffuses on a circle,

$$\phi_t | \phi_{t-dt} \sim \mathcal{N}\left(\phi_{t-dt}, \frac{dt}{\kappa_\phi}\right) \pmod{2\pi}, \quad (7)$$

605 with a diffusion coefficient that decreases with  $\kappa_\phi$ . In Results, we assume  $\kappa_\phi \rightarrow 0$ , implying that  
 606 HD can change arbitrarily across consecutive time steps, which was sufficient to convey intuition  
 607 into the algorithm's workings. However, when simulating stochastic HD trajectories, we assume  
 608 they evolve according to Eq. (7) with  $\kappa_\phi > 0$ , which needs to be accounted for when performing  
 609 inference. Thus, we here assume a non-zero  $\kappa_\phi$  for completeness and reproducibility.

610 The circKF in Eqs. (1) and (2) assumes that the posterior distribution over HD can be approxi-  
 611 mated by a von Mises distribution with time-dependent mean  $\mu_t$  and certainty  $\kappa_t$ , i.e.  $p(\phi_t | v_{0:t}, z_{0:t}) \approx$   
 612  $\mathcal{VM}(\phi_t; \mu_t, \kappa_t)$ . Such an approximation is justified if the posterior is sufficiently unimodal, and can,  
 613 for instance, be compared to a similar approximation employed by extended Kalman filters for  
 614 non-circular variables.

615 An alternative parametrization of the von Mises distribution to its mean  $\mu_t$  and precision  $\kappa_t$ ,  
 616 are its natural parameters,  $\theta_t = (\kappa_t \cos \mu_t, \kappa_t \sin \mu_t)^T$ . Geometrically, the natural parameters can

617 be interpreted as the Cartesian coordinates of a "probability vector", and  $(\mu_t, \kappa_t)$  as its polar co-  
 618 ordinates (Fig. 2b). As we show in the SI, the natural parameter parametrization makes including  
 619 absolute HD observations (Eq. (6)) in the circKF straightforward. In fact, it becomes a vector ad-  
 620 dition. In contrast, including angular velocity observations (Eq. (5)) is mathematically intractable,  
 621 such that the circKF relies on an approximation method called projection filtering<sup>20</sup> to find closed-  
 622 form dynamic expressions for posterior mean and certainty (see ref<sup>21</sup> for technical details, and the  
 623 SI for a more accessible description of the circKF).

Taken together, the circKF for the model specified by Eqs. (5)-(7) reads:

$$d\mu_t = \frac{\kappa_v}{\kappa_\phi + \kappa_v} v_t dt + \frac{\sqrt{2\kappa_z} dt}{\kappa_t} \sin(z_t - \mu_t), \quad (8)$$

$$d\kappa_t = -\frac{f(\kappa_t)}{2(\kappa_\phi + \kappa_v)} \kappa_t dt + \sqrt{2\kappa_z} dt \sin(z_t - \mu_t), \quad (9)$$

624 where  $f(\kappa_t)$  is a monotonically increasing nonlinear function,

$$f(\kappa) = \frac{A(\kappa)}{\kappa_t - A(\kappa) - \kappa A(\kappa)^2}, \quad \text{with } A(\kappa) = \frac{I_1(\kappa)}{I_0(\kappa)}, \quad (10)$$

625 and  $I_0(\cdot)$  and  $I_1(\cdot)$  denote the modified Bessel functions of the first kind of order 0 and 1, respec-  
 626 tively. Setting  $\kappa_\phi \rightarrow 0$  yields Eqs. (1) and (2). Importantly, setting  $\kappa_\phi \rightarrow 0$  does not conceptually  
 627 change the general vector operations we present in Fig. 2.

628 For a sufficiently large  $\kappa$  (i.e., high certainty), the nonlinearity  $f(\kappa)$  approaches the linear func-  
 629 tion,  $f(\kappa) \rightarrow 2\kappa - 2$ . In our **quadratic approximation**, we thus replace the non-linearity by a  
 630 quadratic decay:

$$d\kappa_t = -\frac{1}{\kappa_\phi + \kappa_v} (\kappa_t^2 - \kappa_t) dt + \sqrt{2\kappa_z} dt \sin(z_t - \mu_t), \quad (11)$$

631 which well-approximates the circKF in the high certainty regime.

## 632 Network model

633 We derived a rate-based network model that implements (approximations of) the circKF, by encod-  
 634 ing the von Mises posterior parameters in activity  $\mathbf{r}_t \in \mathbb{R}^N$  of a neural population with  $N$  neurons.  
 635 Thereby, we focused on the simplest kind of network model that supports such an approximation,  
 636 which is of the form:

$$d\mathbf{r}_t = -\frac{1}{\tau} \mathbf{r}_t dt - g(\mathbf{r}_t) \mathbf{r}_t dt + W \cdot \mathbf{r}_t dt + \mathbf{I}_t^{\text{ext}}, \quad (12)$$

637 where  $\tau$  is the network time constant,  $g: \mathbb{R}^N \rightarrow \mathbb{R}_+$  is a scalar nonlinearity, and the elements of  $\mathbf{r}_t$   
 638 are assumed to be ordered by the respective neuron's preferred HD,  $\phi_1, \dots, \phi_N$  (see Eq. (3)). We  
 639 decomposed the recurrent connectivity matrix into  $W = \frac{w_0}{2} W^{\text{const}} + w_1^{\text{even}} W^{\text{cos}} + w_1^{\text{odd}} W^{\text{sin}}$ , where  
 640  $W^{\text{const}}$  denotes a matrix with constant entries, and  $W^{\text{cos}}$  and  $W^{\text{sin}}$  refer to cosine- and sine-shaped  
 641 connectivity profiles (Fig. 4a). Specifically, due to the network's circular symmetry, the entries of  
 642 these matrices only depend on the relative distance in preferred HD, and are given by  $W_{ij}^{\text{const}} = \frac{2}{N}$ ,

643  $W_{ij}^{\cos} = \frac{2}{N} \cos(\phi_i - \phi_j)$ , and  $W_{ij}^{\sin} = \frac{2}{N} \sin(\phi_i - \phi_j)$ . The scaling factor  $\frac{2}{N}$  was chosen to facilitate  
 644 matching our analytical results from the continuum network to the network structure outlined here.  
 645 We further considered a cosine-shaped external input of the form  $I_t^{\text{ext}}(\phi_i) = I_t(dt) \cos(\Phi_t - \phi_i)$  that  
 646 is peaked around an input location  $\Phi_t$ . Here,  $I_t(dt)$  denotes the maximum input in the infinitesimal  
 647 time bin  $dt$ .

648 As described in Results, we assume the population activity  $\mathbf{r}_t$  to encode the HD belief param-  
 649 eters  $\mu_t$  and  $\kappa_t$  in the phase and amplitude of the activity's first Fourier component. As we show in  
 650 the SI, the described network dynamics thus lead to the following dynamics of the cosine-profile  
 651 parameters  $\mu_t$  and  $\kappa_t$ :

$$d\mu_t = w_1^{\text{odd}} dt + \frac{I_t}{\kappa_t} \sin(\Phi_t - \mu_t), \quad (13)$$

$$d\kappa_t = \left( w_1^{\text{even}} - \frac{1}{\tau} \right) \kappa_t dt - g(\mathbf{r}_t) \kappa_t dt + I_t \cos(\Phi_t - \mu_t). \quad (14)$$

652 To derive these dynamics, we assumed the following:

- 653 1. The network is *rate-based*.
- 654 2. Our analysis assumes a continuum of neurons, i.e.  $N \rightarrow \infty$ . For numerical simulations, and  
 655 the network description below, we used a finite-sized network of size  $N$  that corresponds  
 656 to a discretization of the continuous network. SI Fig. S2 demonstrates only a very weak  
 657 dependence of our results on the exact number of neurons in the network.
- 658 3. Our analysis and simulations focused on the first Fourier mode of the bump profile, and is  
 659 thus independent of the exact shape of the profile (as long as Eq. (3) holds).

## 660 Network parameters for Bayesian inference

661 Having identified how the dynamics of the  $\mu_t$  and  $\kappa_t$  encoded by the network (Eqs. (13) & (14))  
 662 depend on the network parameters, we now tuned these parameters to match these dynamics to  
 663 those of the mean and certainty of the circKF (Eqs. (8) & (9)). Specifically, we find for the network  
 664 parameters:

- 665 • Odd recurrent connectivities are modulated by angular velocity observations,  $w_1^{\text{odd}} = \frac{\kappa_v}{\kappa_\phi + \kappa_v} v_t$ ,  
 666 which shifts the activity profile without changing its amplitude<sup>7,8</sup>.
- 667 • Absolute HD observations  $z_t$  are represented as the peak position  $\Phi_t$  of a cosine-shaped  
 668 external input whose amplitude is modulated by the reliability of the observation, i.e.,  $I_t =$   
 669  $\sqrt{2\kappa_z dt}$ . The inputs might contain additional Fourier modes (e.g., a constant baseline), but  
 670 those do not affect the dynamics in Eqs. (13) and (14).
- 671 • The even component of the recurrent excitatory input needs to exactly balance the internal  
 672 activity decay, i.e.,  $w_1^{\text{even}} - \frac{1}{\tau} = 0$ .
- 673 • The decay nonlinearity is modulated by the reliability of the angular velocity observations,  
 674 and is given by  $g(\mathbf{r}_t) = \frac{1}{2(\kappa_\phi + \kappa_v)} f(\kappa(\mathbf{r}_t))$ , where  $f(\cdot)$  equals the nonlinearity that governs

675 the certainty decay in the circKF (Eq. (10)). This can be achieved, e.g., through interaction  
676 with an inhibitory neuron (or a pool of inhibitory neurons) with activation function  $f(\cdot)$  that  
677 computes the activity bump's amplitude  $f(\kappa(\mathbf{r}_t))$ .

## 678 Quadratic approximation

679 To gain additional analytical tractability, we further approximated the recurrent inhibition by one that  
680 takes the form  $g(\mathbf{r}_t)\mathbf{r}_t \rightarrow w^{\text{quad}} \left( \pi \sum_{i=1}^N [r_t^{(i)}]_+ \right) \cdot \mathbf{r}_t$ , where  $[\cdot]_+$  denotes the rectification nonlinearity.  
681 The resulting recurrent inhibition can be shown to be quadratic in the amplitude  $\kappa_t$ , and has the  
682 further benefit of introducing an attractor state at a positive bump amplitude (see below). In the large  
683 population limit,  $N \rightarrow \infty$ , this leads to the amplitude dynamics (see SI for derivation)

$$d\kappa_t = \left( w_1^{\text{even}} - \frac{1}{\tau} \right) \kappa_t dt - w^{\text{quad}} \kappa_t^2 dt + I_t \cos(\Phi_t - \mu_t). \quad (15)$$

684 The dynamics of the phase  $\mu_t$  does not depend on the form of  $g(\cdot)$  and thus remains to be given  
685 by Eq. (13). If we set the network parameters to  $w^{\text{quad}} = \frac{1}{\kappa_\phi + \kappa_v}$  and  $w^{\text{even}} - \frac{1}{\tau} = \frac{1}{\kappa_\phi + \kappa_v}$ , while  
686 sensory input, i.e. angular velocity  $v_t$  and absolute HD observations  $z_t$ , enter in the same way as  
687 before, the network implements the quadratic approximation to the circKF (Eqs. (8) & (11)).

## 688 Ring-attractor networks

689 In absence of absolute HD observations ( $I_t = 0$ ), the amplitude dynamics in Eq. (15) has a stable  
690 **fixed point** at  $\kappa^* = \frac{w^{\text{even}} - 1/\tau}{w^{\text{quad}}}$  and no preferred phase, making it a ring-attractor network. Lin-  
691 earizing the  $\kappa_t$  dynamics around this fixed points reveals that it is approached with **decay speed**  
692  $\beta = w^{\text{even}} - \frac{1}{\tau}$ . A large value of  $\beta$  denotes faster dynamics and thus indicates more rigid attractor  
693 dynamics. In the limit of  $\beta \rightarrow \infty$  we consider the attractor to be a "strict" attractor that, upon  
694 any perturbation, immediately moves back to its attractor state. For the quadratic approximation  
695 network, we find  $\kappa^* = 1$  and  $\beta = \frac{1}{\kappa_\phi + \kappa_v}$ . Further, in our simulations in Fig. 5, we explored network  
696 dynamics with a range of  $\kappa^*$  and  $\beta$  values by adjusting network parameters accordingly.

## 697 Multiple population network

698 We extended the single population network dynamics, Eq. (12), to encompass five populations:  
699 a HD population, which we designed to track HD estimate and certainty with its bump parameter  
700 dynamics, two angular velocity populations (AV+ and AV-), which are tuned to HD and are differ-  
701 entially modulated by angular velocity input, an inhibitory population (INH), and a population that  
702 mediates external input (EXT), corresponding to absolute HD observations. The resulting network  
703 dynamics become (see SI for details):

$$\dot{\mathbf{r}}_t^{HD} = -\frac{1}{\tau_{HD}}\mathbf{r}_t^{HD} + W_{HD\leftarrow HD} \cdot \mathbf{r}_t^{HD} + W_{HD\leftarrow AV+} \cdot \mathbf{r}_t^{AV+} + W_{HD\leftarrow AV-} \cdot \mathbf{r}_t^{AV-} \quad (16)$$

$$+ (W_{HD\leftarrow INH}\mathbf{r}_t^{INH}) \circ \mathbf{r}_t^{HD} + \mathbf{I}_t^{ext}, \quad (17)$$

$$\tau_{AV+}\dot{\mathbf{r}}_t^{AV+} = -\mathbf{r}_t^{AV+} + (o^{AV} + v_t)W_{AV+\leftarrow HD} \cdot \mathbf{r}_t^{HD}, \quad (18)$$

$$\tau_{AV-}\dot{\mathbf{r}}_t^{AV-} = -\mathbf{r}_t^{AV-} + (o^{AV} - v_t)W_{AV-\leftarrow HD} \cdot \mathbf{r}_t^{HD}, \quad (19)$$

$$\tau_{INH}\dot{\mathbf{r}}_t^{INH} = -\mathbf{r}_t^{INH} + W_{INH\leftarrow HD} \cdot [\mathbf{r}_t^{HD}]_+ + W_{INH\leftarrow INH} \cdot \mathbf{r}_t^{INH}. \quad (20)$$

704 Here, the  $W_{to\leftarrow from}$  denote connectivities within and between populations, and  $o^{AV}$  is a constant  
705 activity baseline in the AV populations.

706 The network parameters were tuned such that the activity profile in the HD population tracks  
707 the dynamics of the circKF quadratic approximation, in the same way as for the single-population  
708 network, Eq. (12). To limit the degrees of freedom, we further constrained the connectivity struc-  
709 ture between HD and AV+/- and INH populations by the known connectome of the *Drosophila* HD  
710 system (hemibrain dataset<sup>33</sup>). Specifically, we focused on the connectivities between EPG, PEN1  
711 and  $\Delta 7$  neurons (which in our model corresponds to HD, AV+/- and INH neurons), sorted accord-  
712 ing to anatomical regions within the ellipsoid body and the protocerebral bridge (Fig. 6b). Thereby,  
713 we used total number of synaptic connections between two regions as a proxy for connection  
714 strength. We further assumed that interactions within AV+/- populations and between AV+/- and  
715 INH populations were negligible. The resulting connectivity profile in Fig. 6c was determined by  
716 matching the *Drosophila* connectome as closely as possible, while allowing for modulation of the  
717 across-population connection strengths  $c_0^{HD}, c_1^{HD}, c^{AV\pm\leftarrow HD}, c^{HD\leftarrow AV\pm}, c_0^{INH\leftarrow HD}, c_1^{INH\leftarrow HD},$   
718  $c_0^{INH}, c_1^{INH},$  and  $c^{HD\leftarrow INH}$ . We specify the specific analytic functions we used to create the con-  
719 nectivity matrix in Fig. 6c in the SI, where we also compute the connection strengths analytically.

## 720 Simulation details

### 721 Numerical integration

722 Our simulations in Figs. 4 and 5 used artificial data that matched the assumptions underlying our  
723 models. In particular, the ‘true’ HD  $\phi_t$  followed a diffusion on the circle, Eq. (7), and observations  
724 were drawn at each point in time from Eqs. (5) and (6). To simulate trajectories and observations,  
725 we used the Euler-Maruyama scheme<sup>54</sup>, which supports the numerical integration of stochastic  
726 differential equations. Specifically, for a chosen discretization time step  $\Delta t$ , this scheme is equiv-  
727 alent to drawing trajectories and observations from Eqs. (7), (5) and (6) directly while substituting  
728  $dt \rightarrow \Delta t$ . The same time-discretization scheme was used to numerically integrate the SDEs of the  
729 circKF, Eqs (8) and (9), its quadratic approximation, Eq. (11), and the network dynamics, Eqs. (12)  
730 and (16)-(20).

### 731 Performance measures

732 To measure performance, in Figs. 4f, 5b and 5d we computed the circular average distance<sup>53</sup> of  
733 the estimate  $\mu_T$  from the true HD  $\phi_T$  at the end of a simulation of length  $T = 20$  from  $P = 5'000$



734 simulated trajectories by  $m_1 = \frac{1}{P} \sum_{k=1}^P \exp\left(i\left(\mu_T^{(k)} - \phi_T^{(k)}\right)\right)$ . The absolute value of the imaginary-  
 735 valued circular average,  $0 \leq |m_1| \leq 1$  denotes an empirical precision (or ‘inference precision’), and  
 736 thus measures how well the estimate  $\mu_T$  matches the true HD  $\phi_T$ . Here, a value of 1 denotes an  
 737 exact match. The inference precision is related to the circular variance via  $\text{Var}_{\text{circ}} = 1 - |m_1|$ . In  
 738 SI Fig. S5, we provide histograms with samples  $\mu_T - \phi_T$  with different numerical values of  $|m_1|$ , to  
 739 provide some intuition for the spread of estimates for a given value of the performance measure.

740 We estimated performance through such averages for all absolute HD observation reliabilities  
 741  $\kappa_z$  in Figs. 4f and 5b. For the inset of Fig. 5b, and for Fig. 5d, we additionally performed a grid  
 742 search over the fixed-point amplitude  $\kappa^*$  (inset of Fig. 5b), or both the fixed-point amplitude  $\kappa^*$  and  
 743 of the inverse time constant  $\beta$  (Fig. 5d). For each setting of  $\kappa^*$  and  $\beta$  we assessed the performance  
 744 by computing an average over this performance for a range of observation reliability  $\kappa_z$ , weighted  
 745 by how likely each observation reliability is a-priori assumed to be. The latter was specified by a  
 746 log-normal prior,  $p(\kappa_z) = \text{Lognormal}(\mu_{\kappa_z}, \sigma_{\kappa_z}^2)$ , favouring intermediate reliability levels. We chose  
 747  $\mu_{\kappa_z} = 0.5$  and  $\sigma_{\kappa_z}^2 = 1$  for the prior parameters, but our results did not strongly depend on this  
 748 parameter choice. The performance loss shown in Fig. 5d also relied on such a weighted average  
 749 across  $\kappa_z$ ’s for a particle filter benchmark (PF, see SI for details). The loss itself was then defined  
 750 as  $1 - \frac{\text{Performance}}{\text{Performance PF}}$ .

## 751 Update weights

752 In Fig. 5c, we computed the weight with which a single observation with  $|z_t - \mu_t| = 90^\circ$  changes  
 753 the HD estimate. We defined this weight as the change in HD estimate, normalized by the value  
 754 of the maximum possible change,  $w = \frac{\Delta\mu_t}{\pi} = \frac{1}{\pi} \tan^{-1} \frac{\alpha(\kappa_z dt)}{\kappa_t}$ . Here,  $\alpha(\kappa_z dt)$  denotes a function  
 755 that ensures a linear scaling of the Fisher information with sampling time step (see ref<sup>21</sup>, Theorem  
 756 2, for details about this function). Thus, by design of the observation model, the Fisher information  
 757 of a single observation with reliability  $\kappa_z$  during a time interval  $\Delta t$  is given by  $I_{z_t}(\phi_t) = \kappa_z \Delta t$ .  
 758 We plot the weight as a function of the Fisher information of a single update (how reliable is the  
 759 observation?) and the Fisher information of the current HD estimate (how certain is the current  
 760 estimate?), which is given by

$$I_{\mu_t, \kappa_t}(\phi_t) = \mathbb{E} \left[ \left( \frac{\partial}{\partial \phi} \log \mathcal{VM}(\phi, \mu_t, \kappa_t) \right)^2 \right] = \kappa_t \frac{I_1(\kappa_t)}{I_0(\kappa_t)}. \quad (21)$$

## 761 Details on numerical simulations

762 In our network simulations, we set the network decay constant  $\tau$  to an arbitrary, but non-zero,  
 763 value. Effectively, this resulted in a cosine-shaped activity profile. Note that by setting higher-order  
 764 recurrent connectivities accordingly, other profile shapes could be realized, without affecting the  
 765 validity of our analysis above. From the neural activity vector  $\mathbf{r}_t$ , we retrieved the natural param-  
 766 eters  $\theta_t$  with a decoder matrix  $A = (\cos(\phi^{(i)}), \sin(\phi^{(i)}))^T$ , such that  $\theta_t = A \cdot \mathbf{r}_t$ , and subsequently  
 767 computed the position of the bump by  $\phi_t = \arctan 2(\theta_2, \theta_1)$ , and the encoded certainty (length of  
 768 the population vector) by  $\kappa_t = \sqrt{\theta_1^2 + \theta_2^2}$ .

769 In all our simulations, times are measured in units of inverse diffusion time constant  $\kappa_\phi$ , where  
 770 we set  $\kappa_\phi = 1s$  for convenience. Figures were generated based on simulations with the following

771 parameters:

- 772 • Figure 4e:  $\kappa_v = 2$ ,  $\kappa_z = 10$  (during ‘Visual cue’ bout),  $\kappa_z = 0$  (during ‘Darkness’ bout),  
773  $\Delta t = 0.01$ .
- 774 • Figure 4f, 5b, 5d:  $\kappa_v = 1$ ,  $T = 20$ ,  $\Delta t = 0.01$ . Results are averages over  $P = 5000$  simulation  
775 runs.
- 776 • Figure 5e:  $\kappa_v = 1$ ,  $\kappa_z = 1$ ,  $T = 10$ ,  $\Delta t = 0.01$ .

777 Trajectory simulations and general analyses were performed on a MacBook Pro (Mid 2019)  
778 running 2.3 GHz 8-core Intel Core i9. Parameter scans were run on the Harvard Medical School O<sub>2</sub>  
779 HPC cluster. For all our simulations, we used Python 3.9.1 with NumPy 1.19.2. Jupyter notebooks,  
780 Python scripts, and data to reproduce the figures will be made available upon acceptance of the  
781 manuscript.

## References

1. Wang, X.-J. Synaptic reverberation underlying mnemonic persistent activity. *Trends Neurosci.* **24**, 455–463 (2001).
2. Compte, A. Computational and in vitro studies of persistent activity: Edging towards cellular and synaptic mechanisms of working memory. *Neuroscience* **139**, 135–151 (2006).
3. Hansel, D. & Sompolinsky, H. Modeling Feature Selectivity in Local Cortical Circuits. *Methods Neuronal Model. Ions Netw.* 69 (1998).
4. Rademaker, R. L., Tredway, C. H. & Tong, F. Introspective judgments predict the precision and likelihood of successful maintenance of visual working memory. *J. Vis.* **12**, 21 (2012).
5. Li, H.-H., Sprague, T. C., Yoo, A. H., Ma, W. J. & Curtis, C. E. Joint representation of working memory and uncertainty in human cortex. *Neuron* **109**, 3699-3712.e6 (2021).
6. Knierim, J. J. & Zhang, K. Attractor Dynamics of Spatially Correlated Neural Activity in the Limbic System. *Annu. Rev. Neurosci.* **35**, 267–285 (2012).
7. Zhang, K. Representation of Spatial Orientation by the Intrinsic Dynamics of the Head-Direction Cell Ensemble: A Theory. *J. Neurosci.* **16**, 2112–2126 (1996).
8. Skaggs, W. E., Knierim, J. J., Kudrimoti, H. S. & McNaughton, B. L. A Model of the Neural Basis of the Rat's Sense of Direction. *Adv. Neural Inf. Process. Syst.* 10 (1995).
9. Peyrache, A., Lacroix, M. M., Petersen, P. C. & Buzsáki, G. Internally organized mechanisms of the head direction sense. *Nat. Neurosci.* **18**, 569–575 (2015).
10. Ajabi, Z., Keinath, A. T., Wei, X.-X. & Brandon, M. P. Population dynamics of the thalamic head direction system during drift and reorientation. 2021.08.30.458266 (2021)  
doi:10.1101/2021.08.30.458266.
11. Redish, A. D., Elga, A. N. & Touretzky, D. S. A coupled attractor model of the rodent head direction system. *Netw. Comput. Neural Syst.* **7**, 671–685 (1996).
12. Seelig, J. D. & Jayaraman, V. Neural dynamics for landmark orientation and angular path

- integration. *Nature* **521**, 186–191 (2015).
13. Kim, S. S., Rouault, H., Druckmann, S. & Jayaraman, V. Ring attractor dynamics in the *Drosophila* central brain. *Science* **356**, 849–853 (2017).
  14. Turner-Evans, D. *et al.* Angular velocity integration in a fly heading circuit. *eLife* **6**, e23496 (2017).
  15. Knill, D. C. & Pouget, A. The Bayesian brain: the role of uncertainty in neural coding and computation. *Trends Neurosci.* **27**, 712–719 (2004).
  16. Dehaene, G. P., Coen-Cagli, R. & Pouget, A. Investigating the representation of uncertainty in neuronal circuits. *PLOS Comput. Biol.* **17**, e1008138 (2021).
  17. Kalman, R. E. A New Approach to Linear Filtering and Prediction Problems. *Trans. ASME J. Basic Eng.* **82**, 35–45 (1960).
  18. Kalman, R. E. & Bucy, R. S. New Results in Linear Filtering and Prediction Theory. *J. Basic Eng.* **83**, 95–108 (1961).
  19. Kurz, G., Gilitschenski, I. & Hanebeck, U. D. Recursive Bayesian filtering in circular state spaces. *IEEE Aerosp. Electron. Syst. Mag.* **31**, 70–87 (2016).
  20. Brigo, D., Hanzon, B. & Le Gland, F. Approximate nonlinear filtering by projection on exponential manifolds of densities. *Bernoulli* **5**, 495–534 (1999).
  21. Kutschireiter, A., Rast, L. & Drugowitsch, J. Projection Filtering with Observed State Increments with Applications in Continuous-Time Circular Filtering. *IEEE Trans. Signal Process.* 1–1 (2022) doi:10.1109/TSP.2022.3143471.
  22. Murray, R. F. & Morgenstern, Y. Cue combination on the circle and the sphere. *J. Vis.* **10**, 15–15 (2010).
  23. Wilson, R. & Finkel, L. A Neural Implementation of the Kalman Filter. *Adv. Neural Inf. Process. Syst.* **22**, 9 (2009).
  24. Ben-Yishai, R., Bar-Or, R. L. & Sompolinsky, H. Theory of orientation tuning in visual cortex. *Proc. Natl. Acad. Sci.* **92**, 3844–3848 (1995).

25. Georgopoulos, A., Kettner, R. & Schwartz, A. Primate motor cortex and free arm movements to visual targets in three- dimensional space. II. Coding of the direction of movement by a neuronal population. *J. Neurosci.* **8**, 2928–2937 (1988).
26. Johnson, A., Seeland, K. & Redish, A. D. Reconstruction of the postsubiculum head direction signal from neural ensembles. *Hippocampus* **15**, 86–96 (2005).
27. Ma, W. J., Beck, J. M., Latham, P. E. & Pouget, A. Bayesian inference with probabilistic population codes. *Nat. Neurosci.* **9**, 1432–8 (2006).
28. Beck, J. M., Latham, P. E. & Pouget, A. Marginalization in Neural Circuits with Divisive Normalization. *J. Neurosci.* **31**, 15310–15319 (2011).
29. Lyu, C., Abbott, L. F. & Maimon, G. *A neuronal circuit for vector computation builds an allocentric traveling-direction signal in the Drosophila fan-shaped body.*  
<http://biorxiv.org/lookup/doi/10.1101/2020.12.22.423967> (2020)  
doi:10.1101/2020.12.22.423967.
30. Xie, X., Hahnloser, R. H. R. & Seung, H. S. Double-ring network model of the head-direction system. *Phys. Rev. E - Stat. Phys. Plasmas Fluids Relat. Interdiscip. Top.* **66**, 9–9 (2002).
31. Compte, A. Synaptic Mechanisms and Network Dynamics Underlying Spatial Working Memory in a Cortical Network Model. *Cereb. Cortex* **10**, 910–923 (2000).
32. Turner-Evans, D. B. *et al.* The Neuroanatomical Ultrastructure and Function of a Biological Ring Attractor. *Neuron* S0896627320306139 (2020) doi:10.1016/j.neuron.2020.08.006.
33. Scheffer, L. K. *et al.* A connectome and analysis of the adult Drosophila central brain. *eLife* **9**, e57443 (2020).
34. Hulse, B. K. *et al.* A connectome of the Drosophila central complex reveals network motifs suitable for flexible navigation and context-dependent action selection. *eLife* **10**, e66039 (2021).
35. Green, J. *et al.* A neural circuit architecture for angular integration in Drosophila. *Nature* **546**, 101–106 (2017).

36. Omoto, J. J. *et al.* Visual Input to the Drosophila Central Complex by Developmentally and Functionally Distinct Neuronal Populations. *Curr. Biol.* **27**, 1098–1110 (2017).
37. Fisher, Y. E., Lu, J., D'Alessandro, I. & Wilson, R. I. Sensorimotor experience remaps visual input to a heading-direction network. *Nature* (2019) doi:10.1038/s41586-019-1772-4.
38. Kim, S. S., Hermundstad, A. M., Romani, S., Abbott, L. F. & Jayaraman, V. Generation of stable heading representations in diverse visual scenes. *Nature* 1–6 (2019) doi:10.1038/s41586-019-1767-1.
39. van Bergen, R. S., Ji Ma, W., Pratte, M. S. & Jehee, J. F. M. Sensory uncertainty decoded from visual cortex predicts behavior. *Nat. Neurosci.* **18**, 1728–1730 (2015).
40. Sun, X., Mangan, M. & Yue, S. An analysis of a ring attractor model for cue integration. *Lect. Notes Comput. Sci. Subser. Lect. Notes Artif. Intell. Lect. Notes Bioinforma.* **10928 LNAI**, 459–470 (2018).
41. Sun, X., Yue, S. & Mangan, M. A decentralised neural model explaining optimal integration of navigational strategies in insects. *eLife* **9**, e54026 (2020).
42. Esnaola-Acebes, J. M., Roxin, A. & Wimmer, K. *Bump attractor dynamics underlying stimulus integration in perceptual estimation tasks.* <http://biorxiv.org/lookup/doi/10.1101/2021.03.15.434192> (2021) doi:10.1101/2021.03.15.434192.
43. Carroll, S., Josić, K. & Kilpatrick, Z. P. Encoding certainty in bump attractors. *J. Comput. Neurosci.* **37**, 29–48 (2014).
44. Takiyama, K. Bayesian estimation inherent in a Mexican-hat-type neural network. *Phys. Rev. E* **93**, 052303 (2016).
45. Ernst, M. O. & Banks, M. S. Humans integrate visual and haptic information in a statistically optimal fashion. *Nature* **415**, 429–433 (2002).
46. Piet, A. T., Hady, A. E., Brody, C. D., El Hady, A. & Brody, C. D. Rats adopt the optimal timescale for evidence integration in a dynamic environment. *Nat. Commun.* **9**, 1–12 (2018).

47. Fetsch, C. R., Turner, A. H., DeAngelis, G. C. & Angelaki, D. E. Dynamic reweighting of visual and vestibular cues during self-motion perception. *J. Neurosci.* **29**, 15601–15612 (2009).
48. Merkle, T. & Wehner, R. Desert ants use foraging distance to adapt the nest search to the uncertainty of the path integrator. *Behav. Ecol.* **21**, 349–355 (2010).
49. Campbell, M. G., Attinger, A., Ocko, S. A., Ganguli, S. & Giocomo, L. M. Distance-tuned neurons drive specialized path integration calculations in medial entorhinal cortex. *Cell Rep.* **36**, 109669 (2021).
50. Robertson, R. G., Rolls, E. T., Georges-François, P. & Panzeri, S. Head direction cells in the primate pre-subiculum. *Hippocampus* **9**, 206–219 (1999).
51. Baumann, O. & Mattingley, J. B. Medial Parietal Cortex Encodes Perceived Heading Direction in Humans. *J. Neurosci.* **30**, 12897–12901 (2010).
52. Finkelstein, A. *et al.* Three-dimensional head-direction coding in the bat brain. *Nature* **517**, 159–164 (2015).
53. Mardia, K. V. & Jupp, P. E. *Directional Statistics*. 3 (John Wiley & Sons, 2000).  
doi:10.1002/9780470316979.
54. Kloeden, P. E. & Platen, E. *Numerical solution of stochastic differential equations*. (Springer, 2010).
